# Supplementary material
Source: PubMed Central journal article supplement (PMC8504956)
Supplement: sj-pdf-1-jcb-10.1177_0271678X211007949.pdf [file sj-pdf-1-jcb-10.1177_0271678X211007949.pdf]

## **Supplementary Information**

**Supplementary Table S1.** Total distribution volume ( $V_T / f_p$ , mL·cm<sup>-3</sup>) of [<sup>11</sup>C]clozapine ([<sup>11</sup>C]CLZ) and [<sup>11</sup>C]deschloroclozapine ([<sup>11</sup>C]DCZ) in regions of monkey brain

| Region                     | <sup>11</sup> C]CLZ |     |     |         | <sup>11</sup> C]DCZ |     |         |          |
|----------------------------|---------------------|-----|-----|---------|---------------------|-----|---------|----------|
|                            | BL<br>(n=3)         | CNO | CLZ | CTM+CNO | BL<br>(n=3)         | CNO | DCZ-Low | DCZ-High |
| Frontal Cortex             | 532 ± 68            | 258 | 314 | 390     | 67 ± 5              | 35  | 41      | 32       |
| Cingulate Cortex           | 521 ± 38            | 258 | 326 | 402     | 68 ± 7              | 32  | 40      | 29       |
| Striatum                   | 469 ± 24            | 288 | 342 | 421     | 55 ± 7              | 35  | 44      | 31       |
| Insula                     | 549 ± 57            | 258 | 320 | 402     | 71 ± 11             | 33  | 41      | 28       |
| Temporal Cortex            | 428 ± 39            | 214 | 276 | 343     | 51 ± 5              | 26  | 32      | 25       |
| Amygdala                   | 688 ± 73            | 289 | 365 | 425     | 86 ± 10             | 38  | 41      | 30       |
| Hippocampus                | 464 ± 27            | 236 | 309 | 378     | 61 ± 9              | 29  | 34      | 27       |
| Thalamus                   | 343 ± 30            | 248 | 309 | 401     | 46 ± 17             | 30  | 35      | 27       |
| Parietal Cortex            | 550 ± 90            | 269 | 329 | 438     | 70 ± 15             | 32  | 39      | 29       |
| Occipital Cortex           | 410 ± 48            | 217 | 278 | 365     | 51 ± 9              | 29  | 32      | 26       |
| Cerebellum                 | 250 ± 14            | 204 | 224 | 282     | 29 ± 2              | 26  | 29      | 24       |
| Right Amygdala<br>(Target) | 1440 ± 171          | 439 | 361 | 420     | 248 ± 40            | 60  | 51      | 27       |
| Left Amygdala<br>(Mirror)  | 450 ± 53            | 230 | 319 | 375     | 58 ± 5              | 32  | 39      | 30       |

$V_T / f_p$ : Total distribution volume corrected for the free fraction in plasma. Values represent mean ± SD from three baseline scans and three blocked scans for each radioligand. The doses of the blocking agents are provided in the legend of Figure 1.

**Supplementary Table S2.** Definition and explanation of key terms

| <b>Term</b> | <b>Definition</b>                                               | <b>Explanation</b>                                                                                                                                                                                                                                                                                                                                                                                                                         |
|-------------|-----------------------------------------------------------------|--------------------------------------------------------------------------------------------------------------------------------------------------------------------------------------------------------------------------------------------------------------------------------------------------------------------------------------------------------------------------------------------------------------------------------------------|
| $BP_{ND}$   | Binding potential                                               | Ratio at equilibrium of specific binding to nondisplaceable compartment.<br>$BP_{ND} = V_S / V_{ND}$<br>For any brain region, $BP_{ND} \geq BP_{ND}'$ , because the numerator of $BP_{ND}$ includes both on-target and off-target binding.                                                                                                                                                                                                 |
| $BP_{ND}'$  | Ratio of on-target binding to nondisplaceable uptake            | $BP_{ND}' = V_{S-on} / V_{ND}$<br>For this study, $V_{S-on}$ reflects binding to the transfected receptor. $V_{ND}$ reflects background radioactivity in areas devoid of receptors. Thus, $BP_{ND}'$ is the “signal-to-background ratio” and reflects contrast in the image.<br>$BP_{ND}'$ is the primary outcome measure used to compare [ $^{11}C$ ]CLZ and [ $^{11}C$ ]DCZ.                                                             |
| $C_{ND}$    | Concentration of radioligand in the nondisplaceable compartment | $C_{ND}$ is the total concentration of radioligand in the nondisplaceable compartment plus nonspecific binding.<br>$C_{ND} = F + C_{NS}$                                                                                                                                                                                                                                                                                                   |
| $C_P$       | Concentration of radioligand in plasma                          | $C_P$ is the total concentration of radioligand in plasma and equals Free (F) plus protein binding.                                                                                                                                                                                                                                                                                                                                        |
| $f_{ND}$    | Free fraction in brain                                          | Ratio at equilibrium of free concentration in brain to free plus nonspecific binding.<br>$f_{ND} = F / C_{ND}$                                                                                                                                                                                                                                                                                                                             |
| $f_P$       | Free fraction in plasma                                         | Ratio at equilibrium of free concentration in plasma to free plus nonspecific binding.<br>$f_P = F / C_P$                                                                                                                                                                                                                                                                                                                                  |
| $K_i$       | Inhibition constant                                             | $K_i$ is measured in vitro and is inversely related to the affinity of the (radio)ligand                                                                                                                                                                                                                                                                                                                                                   |
| $V_{ND}$    | Nondisplaceable distribution volume                             | Ratio at equilibrium of concentration of radioligand in nondisplaceable compartment to the concentration of radioligand in plasma $C_P$                                                                                                                                                                                                                                                                                                    |
| $V_S$       | Specific distribution volume                                    | Ratio at equilibrium of the concentration of radioligand that is specifically bound in brain to the concentration of radioligand in plasma $C_P$ . Specific binding refers to displaceable (i.e., high-affinity) binding of radioligand in brain. These radioligands have two types of displaceable binding: on-target (i.e., to the transfected receptor) and off-target (i.e., to endogenous receptors).<br>$V_S = V_{S-on} + V_{S-off}$ |
| $V_{S-off}$ | Off-target distribution volume                                  | Off-target binding is displaceable (i.e., high affinity) binding to sites other than the transfected receptor. Such                                                                                                                                                                                                                                                                                                                        |

|            |                               |                                                                                                                                                                                                                                                |
|------------|-------------------------------|------------------------------------------------------------------------------------------------------------------------------------------------------------------------------------------------------------------------------------------------|
|            |                               | off-target binding is to endogenous receptors.                                                                                                                                                                                                 |
| $V_{S-on}$ | On-target distribution volume | For this study, the target is the transfected human receptor. Thus, $V_{S-on}$ is the ratio at equilibrium of the concentration of radioligand that is bound to the transfected receptor to the concentration of radioligand in plasma $C_P$ . |
| $V_T$      | Total distribution volume     | Ratio at equilibrium of concentration of all radioligand in brain to the concentration of radioligand in plasma $C_P$ .<br>$V_T = V_S + V_{ND} = V_{S-on} + V_{S-off} + VND$                                                                   |

Any of the various types of distribution volume  $V$  can be corrected (i.e., divided by) the free fraction in plasma of the radioligand, as in  $V_S / f_P$ . Correcting for free fraction in plasma reflects the properties of the radioligand binding in the brain and is independent of varying amounts of binding to plasma proteins.

**Supplementary Table S3.** Off-target binding of [<sup>11</sup>C]clozapine ([<sup>11</sup>C]CLZ) and [<sup>11</sup>C]deschloroclozapine ([<sup>11</sup>C]DCZ) determined with two-tissue compartment model in regions of monkey brain

| Region                 | $V_{S-off} / f_P$ (mL · cm <sup>-3</sup> ) |                       |
|------------------------|--------------------------------------------|-----------------------|
|                        | [ <sup>11</sup> C]CLZ                      | [ <sup>11</sup> C]DCZ |
| Frontal Cortex         | 274 ± 29                                   | 41 ± 5                |
| Cingulate Cortex       | 263 ± 37                                   | 41 ± 4                |
| Striatum               | 210 ± 66                                   | 28 ± 7                |
| Temporal Cortex        | 169 ± 35                                   | 24 ± 4                |
| Occipital Cortex       | 151 ± 27                                   | 24 ± 6                |
| Cerebellum             | -9 ± 65                                    | 3 ± 4                 |
| Left Amygdala (mirror) | 192 ± 70                                   | 32 ± 7                |

$V_{S-off} / f_P$ : off-target distribution volume corrected for the free fraction in plasma

Values represent mean ± SD from three baseline scans and three blocked scans for each radioligand. The doses of the blocking agents are provided in the legend of Figure 1.

**Supplementary Table S4.** Effect of lipophilicity and affinity on radioligand binding in plasma and brain.

| Radioligand           | Lipophilicity<br>( $\text{clog}D$ ) <sup>a</sup> | Affinity<br>$K_i$ <sup>b</sup> (nM) | Plasma<br>$f_p$ (%) | Brain    |                                    |                                    |
|-----------------------|--------------------------------------------------|-------------------------------------|---------------------|----------|------------------------------------|------------------------------------|
|                       |                                                  |                                     |                     | $f_{ND}$ | $V_{S\text{-on}}/f_p$              | $V_{ND}/f_p$                       |
|                       |                                                  |                                     |                     | (%)      | ( $\text{mL}\cdot\text{cm}^{-3}$ ) | ( $\text{mL}\cdot\text{cm}^{-3}$ ) |
| [ <sup>11</sup> C]CLZ | 3.4                                              | 0.9                                 | 6                   | 0.4      | 990                                | 258                                |
| [ <sup>11</sup> C]DCZ | 2.6                                              | 4.2                                 | 22                  | 3.8      | 190                                | 27                                 |

$\text{cLog}D$ : calculated  $\log D$ ;  $K_i$ : inhibition constant;  $f_p$ : free fraction in plasma;  $f_{ND}$ : free fraction in brain;  $V_{S\text{-on}}/f_p$ : on-target displaceable binding corrected for free fraction in plasma (i.e., to the transfected receptor);  $V_{ND}/f_p$ : nondisplaceable uptake corrected for free fraction in plasma.

<sup>a</sup>Values were calculated using Pallas 3.70 software and ACD software (version 9.04; Advanced Chemistry Development, Inc., Toronto, Canada). Note: affinity is inversely related to  $K_i$ .

<sup>b</sup>Values were reported by Nagai and colleagues<sup>1</sup>.

Supplementary Figure S1

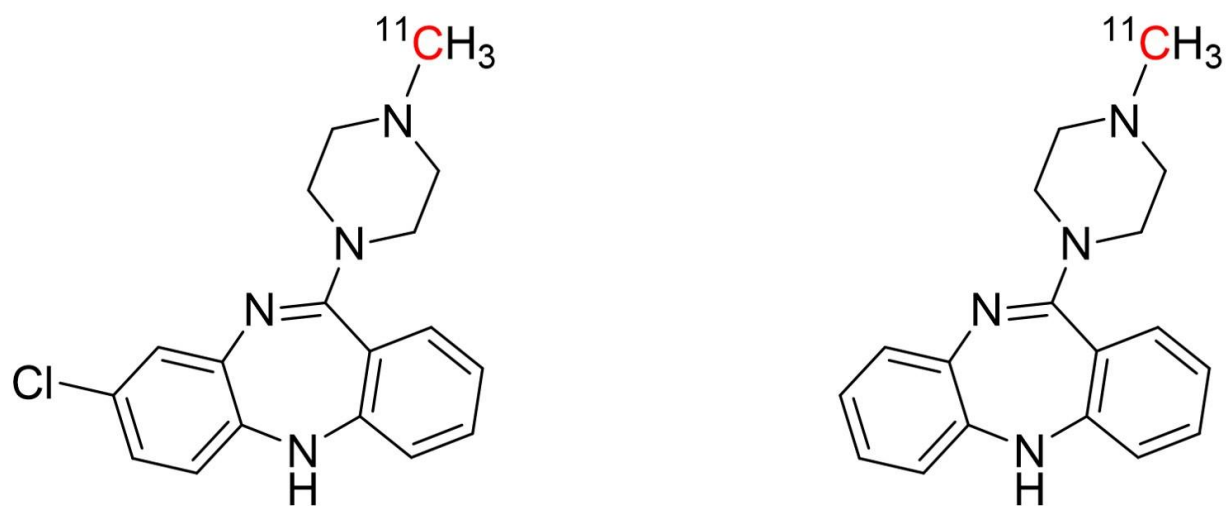

Supplementary Figure S1. Structures of DREADDs Ligands [<sup>11</sup>C]CLZ and [<sup>11</sup>C]DCZ.

## Supplementary Figure S2

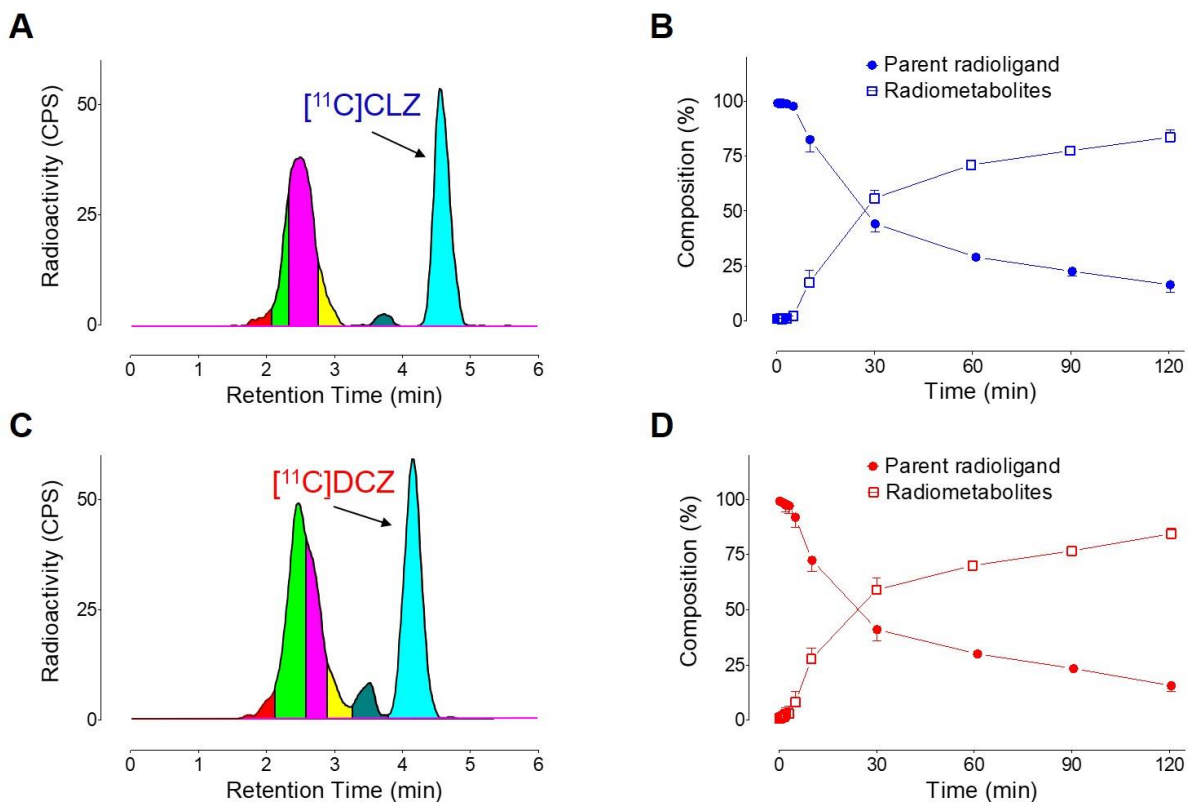

**Supplementary Figure S2.** Radiochromatograms and percentage composition of monkey plasma after injection of  $[^{11}\text{C}]\text{clozapine}$  ( $[^{11}\text{C}]\text{CLZ}$ ) (**A, B**) or  $[^{11}\text{C}]\text{deschloroclozapine}$  ( $[^{11}\text{C}]\text{DCZ}$ ) (**C, D**). The radiochromatograms (**A** and **C**) of plasma acquired at 30 minutes post-administration showed that radiometabolites, eluting before the parent tracer, constituted the majority of radioactivity: 41% for  $[^{11}\text{C}]\text{CLZ}$  and 38% for  $[^{11}\text{C}]\text{DCZ}$ . The percentage composition over time (**B** and **D**) for both radioligands was also similar: 50% composition occurred slightly before 30 minutes for both. Error bars represent the standard deviation (SD) of three scans.

### Supplementary Figure S3

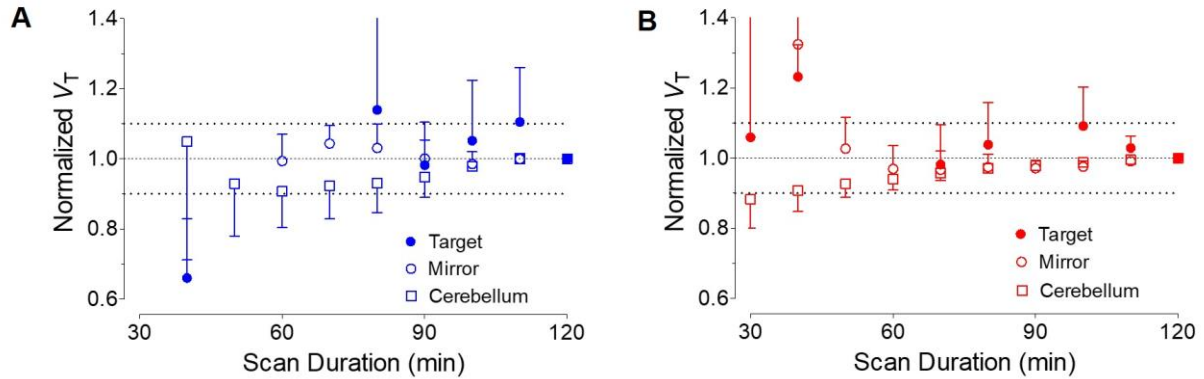

**Supplementary Figure S3.** Total distribution volume ( $V_T$ ) time stability of [ $^{11}\text{C}$ ]clozapine ([ $^{11}\text{C}$ ]CLZ) (A) and [ $^{11}\text{C}$ ]deschloroclozapine ([ $^{11}\text{C}$ ]DCZ) (B) for three regions: target (right amygdala), mirror (left amygdala), and cerebellum.  $V_T$  was calculated using an unconstrained two-tissue compartment model with increasingly truncated acquisition times, from 0-120 minutes to 0-30 minutes. All  $V_T$  values were normalized as a percentage of the terminal value attained from 120 minutes of imaging. Data represent mean  $\pm$  SD of three scans.



## Supplementary Figure S4

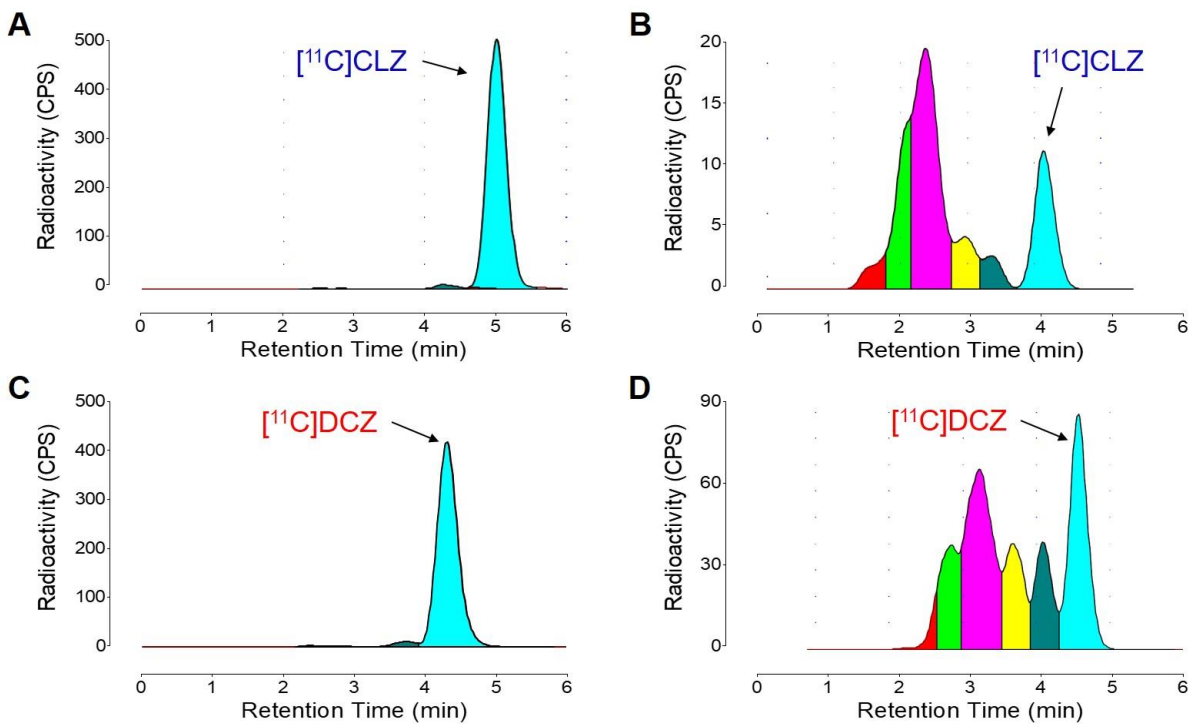

**Supplementary Figure S4.** Radiochromatograms of activity extracted from rat brain 30 minutes after injection of [ $^{11}\text{C}$ ]clozapine ([ $^{11}\text{C}$ ]CLZ) (A) or [ $^{11}\text{C}$ ]deschloroclozapine ([ $^{11}\text{C}$ ]DCZ) (B). Most of the radioactivity for both radioligands represented parent radioligand: 98% for [ $^{11}\text{C}$ ]CLZ and 97% for [ $^{11}\text{C}$ ]DCZ.

## Supplementary References

1. Nagai Y, Miyakawa N, Takuwa H, Hori Y, Oyama K, Ji B *et al.* Deschloroclozapine, a potent and selective chemogenetic actuator enables rapid neuronal and behavioral modulations in mice and monkeys. *Nat Neurosci* 2020; 23: 1157-1167.
